# ADA News and Meetings

## Cow's Milk and Juvenile Diabetes

A recent study published in the *New England Journal of Medicine* states that drinking cow's milk may trigger the onset of juvenile diabetes in individuals genetically prone to diabetes. The study concluded that avoiding milk for at least the first 9 mo of life may prevent the onset of diabetes. The study suggests that drinking cow's milk starts the process of  $\beta$ -cell destruction in 1 of 500 people who get diabetes by age 20 yr. The number of subjects studied was relatively small, with 142 children with diabetes being compared with 79 healthy, nondiabetic children and 300 adult blood donors.

The consensus among the research community seems to be that although these findings are exciting, they are highly circumstantial and more research needs to be conducted to come up with more conclusive results. As Dr. George Eisenbarth of the Joslin Diabetes Center in Boston and Associate Editor of the journal *Diabetes* says, "I think it's very interesting . . . It doesn't test the next part of the theory yet—whether we can change the development of diabetes by avoiding cow's milk."

## Blood Cholesterol Levels in Children and Adolescents

The U.S. Department of Health and Human Services, in conjunction with the National

Institutes of Health; the National Heart, Lung, and Blood Institute; and the National Cholesterol Education Program has published the "Report of the Expert Panel on Blood Cholesterol Levels in Children and Adolescents" as part of the National Cholesterol Education Program. To place an order for a free copy, call (301) 951-3260 or write NHLBI Info Center at P.O. Box 30105, Bethesda, MD 20824-0105.

## *The following were elected to the Professional Section as of December 1991:*

CLINIC PHARMACY, MANITOWOC, WI  
FOOT & ANKLE CENTER, INC.,  
BETHLEHEM, PA  
KEWEENAW NURSING HOME, LAURIUM, MI  
DOLORES ALBANESE, WILMINGTON, DE  
MAUDE ALLEN, RN, GREAT BEND, KS  
KHOSROW ALYESHMERNI, MD, FOREST HILLS, NY  
DEBORAH A. ANZALONE, MD,  
WILMINGTON, DE  
GEORGINA A. ASANTE, COLUMBUS, GA  
YASSIR ATTALLA, MD, RIVERVIEW, MI  
HAK YUN BAE, MD, KWANGJU, KOREA  
CATHERINE L. BAIN, MD, CARMEL, IN  
SANDRA A. BARKER, CHANDLER, AZ  
JACK BASTOW, ALBANY, NY  
CHARLES E. BEACHLEY, CARROLLTON, TX  
KIMBERLY A. BENTER, PHOENIX, AZ  
CYNTHIA L. BESS, MURFREESBORO, TN

DIANE BETTENCOURT, FOLSOM, CA  
WICKLIFFE L. BLASHI, LCSW, CARLSBAD, CA  
SUSAN R. BOOKMAN, BRIDGETON, NJ  
DAVID A. BOYKO, KING OF PRUSSIA, PA  
RONALD L. BRAZG, MD, RENTON, WA  
ROSS J. BRECHNER, ATLANTA, GA  
JEFFREY S. BROWN, MD, HOUSTON, TX  
JOAN L. BRUTSCHE, RN, GREENVILLE, OH  
TONYA VAN BUEREN, PORTLAND, OR  
THEODORE BURDEN, PHILADELPHIA, PA  
BEVERLY D. BURGHER, NASHVILLE, TN  
NEIL BURRELL, BEAUMONT, TX  
DIANA BUSCH, HEMLOCK, MI  
LAURA L. BUTLER, AMARILLO, TX  
R. W. CALHOUN, MD, LAKE CHARLES, LA  
MARY ANN CARDILE, MD, BRONX, NY  
ANNE M. CARROLL, LAWRENCE, MA  
FERNANDO CARVALHO, MD, CLAVERACK, NY  
DAWN CERBONE, FT. LAUDERDALE, FL  
CECILIA D. CERVANTES, MANHASSET, NY  
GERALD A. CHARNOGURSKY, NAPERVILLE, IL  
JENSEN CHENG, NASHUA, NH  
ANDREW H. COHEN, CAPE CORAL, FL  
MARGO W. COMPTON, BLANCH, NC  
KATHLEEN COOK, RN, CDE, SILVIS, IL  
GLENDA CORKER, RN, SAN ANGELO, TX  
DANIEL G. CORREDOR, MD, HOUSTON, TX  
RUTH DALY, RN, MINNEAPOLIS, MN  
KAREN DAVID, VANCOUVER, BRITISH COLUMBIA, CANADA  
JANE DAVIS, GLENDALE, CA  
SUSAN M. DEABATE, CHESAPEAKE, VA  
CAROLE DEBONTE, FULTONVILLE, NY  
PAMELA R. DELERME, CNM, WEST HAVEN, CT  
LORI R. DeLUCIA, MS, RD, WEST ORANGE, NJ  
IRA M. DEMING, DPM, SILVER SPRING, MD  
LAMBERTO DIAZ PEREDA, MD, BRYAN, OH  
NADYA DIMITROV KATZ, SMITHTOWN, NY  
PAUL A. DORN, JR., MD, TEMPLE HILLS, MD

- DANIEL C. DUFFY, LORAIN, OH  
 ELIZABETH VAN DYKES, MS, RD,  
 VIROQUA, WI  
 ROBERT EASTIN, VILLE PLATE, LA  
 JUDY EGAN, VENICE, FL  
 DAVID C. ELDRIDGE, OD, OKMULGEE,  
 OK  
 MARY ANN EZZEH, DUNCANVILLE, TX  
 PATRICIA FAINSTEIN DAY, MD, BUENOS  
 AIRES, ARGENTIA  
 DAWN FAIRLIE, STATEN ISLAND, NY  
 THELMA FALIN, RN, KINGSPORT, TN  
 W. FEEDER, BROOKLYN, NY  
 KEN FERST, BRONX, NY  
 MORTON HERBERT FIELD, MD, BEVERLY  
 HILLS, CA  
 DIANE G. FIRST, WINTER SPRINGS, FL  
 LEONARD VICTOR FISHER, MD, LOS  
 ANGELES, CA  
 JOHN FLOM, MD, YANKTON, SD  
 VIVIAN FONSECA, LITTLE ROCK, AR  
 WILLIAM A. FOOTE, HAMILTON SQUARE,  
 NJ  
 NANCY E. FORTESBERY, CHARLOTTE, NC  
 KAMI FOX, RN, CENTERVILLE, OH  
 GARY FREIDENBERG, INDIANAPOLIS, IN  
 ALVIN H. FRIED, MD, W. LONG BRANCH,  
 NJ  
 HOWARD FUGATE, JR., MD, DU BOIS, PA  
 LINDA GALLAGHER, ESSINGTON, PA  
 ELAINE GARRETT, RD, LD, CDE,  
 NORMAN, OK  
 THOS GARTMAN, MD, CHICOPEE, MA  
 NOMI GEORGE, COLLEYVILLE, TX  
 BEVAN A. GESLANI, TAMUNING, GUAM  
 KITTY GIBSON, SAN LUIS OBISPO, CA  
 MARTIN T. GIRLING, PLANT CITY, FL  
 CAROLYNE GLASS, RNC, SAN ANGELO,  
 TX  
 JOANNE M. GOBBI, NORTH HOLLYWOOD,  
 CA  
 KIRSTEN GRAM, RD, CDE, EUGENE, OR  
 KAY M. GROTT, MS, RN, C, GNP,  
 BRENTWOOD, TN  
 CHUNG GU CHO, MD, KOREA  
 ANDERS HALLBERG, MD, UPPSALA,  
 SWEDEN  
 FLORIANE HALLGREN, RN, MAPLE GROVE,  
 MN  
 J. R. HANFT, MIAMI, FL  
 ANNE L. HARREL, KENSINGTON, MD  
 DANITA HARRISON, MOTINE, IL  
 KATHY HEITKAMP, FARGO, ND  
 DAVID J. HERZIG, ANN ARBOR, MI  
 FRANCES G. HESS, RD, LIVONIA, MI  
 THOMAS L. HOFFMAN, DPM, CLEARFIELD,  
 PA  
 LAVERNE HOHNSTREITER, ALBUQUERQUE,  
 NM  
 CAROL B. HOLLEMAN, CORONA DEL MAR,  
 CA  
 JENNIFER HONE, WASHINGTON, DC
- JAMES M. JACKSON, MD, SHREVEPORT,  
 LA  
 F. EARL JOHNSTON, TULSA, OK  
 CANDACE M. KAMMERER, PhD, SAN  
 ANTONIO, TX  
 HANK KANG, MD, VESTAL, NY  
 FLORENCE KASDEN, GREENBELT, MD  
 ARTHUR B. KELLERT, DPM, ANN ARBOR,  
 MI  
 CAROLYN KELLY, MASTIC BEACH, NY  
 ANDREA BETH KENT, AUGUSTA, GA  
 ROBERT KLERSTEIN, DPM, KIRKLAND,  
 WA  
 SANDRA KUHN, TROY, OH  
 STEPHEN J. LEONARD, SPRING HILL, FL  
 LEONARD LEVITAN, MERRICK, NY  
 NITA C. LEWIS, RN, BSN, CCRN,  
 MARTINS FERRY, OH  
 DOUGLAS F. LINDAHL, SEATTLE, WA  
 COURTNEY LONCHENA, SOMERVILLE, NJ  
 CAROL LYNN, BEMIDJI, MN  
 SUE MACASKILL, FORT LUPTON, CO  
 KATHERINE MCFADDEN, ALAMEDA, CA  
 SUNNY YANG MELENDEZ, MD, TORRANCE,  
 CA  
 TODD W. MEREDITH, LITTLE ROCK, AR  
 SHARON MICHAEL, RN, MS, DENVER, CO  
 EILEEN F. MIKUS, PETOSKEY, MI  
 ROSE E. MILES, RN, BRONX, NY  
 LORRAINE MOCIK, NORTH ARLINGTON, NJ  
 HELEN MOLCHAN, RN, BOLIVAR, MO  
 PATRICIA MORGAN, BALTIMORE, MD  
 DIANE MORGENROTH, HEWLETT, NY  
 R. MURPHY HANEY, DPM, MIAMI, FL  
 TAKASHI NAITOU, TAGAJYO, JAPAN  
 M. Y. NASIR, MD, MONTEREY PARK, CA  
 AMR A. NASRAT, RIYADH, SAUDI ARABIA  
 ANGELLA A. NEWELL, BILOXI, MS  
 DIANE H. NORRBY, CPSP PROVIDER,  
 SALINAS, CA  
 ANNE O'CONNOR, ALBUQUERQUE, NM  
 ETHEL C. OLSON, RNP, SALT LAKE CITY,  
 UT  
 SUSAN O'NEAL, MD, OTTAWA, IL  
 ANITA ONUFER, PITTSBURGH, PA  
 ANGELO PANZARELLA, CONCORD, CA  
 GAIL A. PASS, RN, BSN, SANTA ROSA,  
 CA  
 ARUNA A. PATEL, TIFTON, GA  
 BRIAN PATTERSON, MARION, IN  
 CONNIE PAVLOVICH, LARAMIE, WY  
 MARK A. PERKINS, MAYWOOD, NJ  
 ROSEMARY PERRY, RN, MPH, CDE,  
 MILLBURN, NJ  
 CLAUDIA S. PLAISTED, DURHAM, NC  
 SHARON PLUMMER, ST. LOUIS, MO  
 MICHAEL VAN PRETER, TAMA, IO  
 DONNA E. PRIOR, ANN ARBOR, MI  
 CONSTANCE PRZYBILLA, WHITEHALL, WI  
 MARY RAGSDALE, RN, CDE,  
 BLOOMINGTON, MN  
 TERESA D. RAJALA, MD, ALLEN, TX
- LAWRENCE M. RESNICK, MD, NEW YORK,  
 NY  
 LUIS REYES, EL PASO, TX  
 RANDALL M. ROBINSON, MD, CLAYTON,  
 MO  
 CHERYL L. ROCK, ANN ARBOR, MI  
 ROSA ROJO, TAMPA, FL  
 CARL ROMERO, COLORADO SPRINGS, CO  
 LINDA L. ROTH, RN, OMAHA, NE  
 JAMES BENNETT ROUSH, ELMIRA, NY  
 MICHAEL J. ROWLAND, MD, AUGUSTA,  
 GA  
 MARY RUSSELL, EL PASO, TX  
 JOSE M. SALGADO  
 RICHARD L. SAWICKI, NIAGARA FALLS, NY  
 LEE SCHLENKERT, RN, ROYAL OAK, MI  
 STEVEN E. SCHLIES, FOX POINT, WI  
 SCOTT SCHROEDER, MOUNT VERNON, WA  
 ANDREA SCHULMAN, TAMARAC, FL  
 JANE WILLIS SCHULTZ, SPOTSYLVANIA, VA  
 PAT SCHUTZIUS, SAN ANTONIO, TX  
 JACQUELINE KAY SHARRATT, WATERLOO,  
 ONTARIO, CANADA  
 CHERYL SHEDD, LAWRENCEVILLE, GA  
 NURUL H. SIDDIQJ, MD, VINELAND, NJ  
 J. MARJORIE SIMONS, LOS ANGELES, CA  
 MARGARET R. SIMONS, IOWA CITY, IA  
 ADAM K. SPECTOR, SILVER SPRING, MD  
 CAROL SPICER, PICAYUNE, MS  
 ELYSSA JOY SPRINGER, CHICAGO, IL  
 PAULETTE STALEY, CHOWCHILLA, CA  
 JULIA STANLEY, JACKSONVILLE, FL  
 GERALD STEIN, MD, MADISON HEIGHTS,  
 MI  
 PAUL STEPANCZUK, DPM, LANSING, IL  
 KAZUHIRO SUGIMOTO, HIROSAKI, JAPAN  
 SHELLI SWEAT, TISHOMINGO, OK  
 JAMES C. THOMAS, MD, MT. PLEASANT,  
 SC  
 RAYMOND F. TIERNEY, NEWPORT, RI  
 JOHN A. TODD, HEADINGTON OXFORD,  
 OX, UNITED KINGDOM  
 E. J. TOMASIK, CUDAHY, WI  
 GAIL TOPPING, HOLLYWOOD, FL  
 VICTORIA LEE TRAVIS, DENVER, CO  
 CLAIRE TURNER, CLINTON, OK  
 FRANCES E. WALKER, DAUPHIN ISLAND,  
 AL  
 MARK ALLAN WALKER, MD,  
 RANDALLSTOWN, MD  
 CAROLE WEBBER, BANGOR, MA  
 ROBERT W. WELLS, MD, FRESNO, CA  
 GARY WENICK, MD, KATONAH, NY  
 SUSAN T. WEST, JACKSON, KY  
 D. WICKLIFF, MANASSAS, VA  
 JANE WILDE, PRINCE RUPERT, BRITISH  
 COLUMBIA, CANADA  
 JAN WILLIAMS, RN, ARDMORE, OK  
 CLYDIE S. WRIGHT, VENTURA, CA  
 EDWARD M. YAGOOBIAN, DPM, DIAMOND  
 BAR, CA

STANLEY JAY ZIMMERMAN, MD, HOUSTON, TX  
 NANCY K. ZOLMAN, FORT WAYNE, IN  
 HAWYARD K. ZWERLING, MD, LOWELL, MA

ADA, 1660 Duke Street, Alexandria, VA 22314, 703-549-1500, x215.

### **19th Annual Meeting of the International Study Group of Diabetes in Children and Adolescents**

The International Study Group of Diabetes in Children and Adolescents will hold its annual meeting 2–6 September 1993 in the Aegean Sea on board the cruise ship Neptune. For more information, contact Dr. C. Bartsocas, Dept. of Pediatrics, P & A Kyriakou Children's Hospital, GR-11527 Athens, Greece. Fax: 30-1-7796461

### **12th Danube Symposium**

The 12th Danube Symposium on Diabetes Mellitus will be held 7–10 October 1993 in Krakow, Poland. The topics include long-term diabetes complications, insulin therapy, diabetes mellitus in children, and gestational diabetes mellitus. The deadline for registration and abstracts is 1 April 1993. For more information contact Associate Professor Jacek Sieradzki, Department of Endocrinology, Medical Academy in Krakow, 31-501 Krakow, Kopernika 17, Poland. Tel: 48 12 21 01 44; Fax: 48 12 21 40 54.

### **American Board of Internal Medicine Examinations**

The 1993 Certification and Recertification Examinations in Endocrinology, Diabetes, and Metabolism will be held 3 November 1993. The registration period is from 1 January 1993 to 1 April 1993. The 1993 Certification Examination for Added Qualifications in Sports Medicine will be held 30 September 1993. The registration period is from 1 September 1992 to 15 January 1993. For more information and applications contact Registration Section, American Board of Internal Medicine, 3624 Market Street, Philadelphia, PA 19104. Tel: 1-800-441-2246; Fax: 1-215-243-1500.

### **15th International Diabetes Federation Congress**

The International Diabetes Federation will hold its 15th annual congress 6–11 November 1994 at the Kobe Convention

## *ADA Events*

### **Future Meetings**

53rd Annual Meeting: 12–15 June 1993, Las Vegas Convention Center, Las Vegas, NV.

40th Postgraduate Course: 22–24 January 1993, Fairmont Hotel, San Francisco, CA.

12th International Diabetes Immunology Workshop: 15–17 April 1993, Orlando Marriott, Orlando, FL.

4th International Symposium on Insulin, IGFs, and their Receptors: 20–23 April 1993, Marine Biological Laboratories, Woods Hole, MA.

### **Diabetes: A Rural State's Perspective**

The North Dakota Affiliate will hold its 17th Annual Professional Symposium for Physicians and Other Health Care Professionals titled "Diabetes: A Rural State's Perspective" on 6 November 1992 at the Holiday Inn in Fargo. The program will cover topics such as type I diabetes management, pregnancy and diabetes, and diabetes diet and nutrition. For more information, contact Mary Ann Keller, Box 234, 101 North Third, Grand Forks, ND 58206. Tel.: (701) 746-4427; Fax: (701) 746-9337

### **Consensus Development Conference on Dyslipidemia**

ADA will be holding a consensus development conference on the detection and management of lipid disorders in diabetes 11–13 January 1993. Registration information will be mailed to all ADA professional members in late September. For more information, contact Linda Cann,

## *Other Events*

### **5th World Congress on Diabetes in the Tropics and Developing Countries**

The Diabetic Association of India will sponsor the "5th World Congress on Diabetes in the Tropics and Developing Countries" 31 January–2 February 1993 in Bombay, India. For more information, contact General Secretary, 5th World Congress on Diabetes in the Tropics and Developing Countries, All India Institute of Diabetes, S.L. Raheja Hospital, Mahim, Bombay 400 016. India. Telex: 011-78006 RR IN; Fax: 91-22-6498569.

### **International Symposium on Diabetic Polyneuropathies**

An international symposium on diabetic polyneuropathies to celebrate the 150th anniversary of the University of Erlangen will be held 5–6 March 1993. For more information contact Dr. B. Neundorfer or Dr. D. Claus, Department of Neurology, Schwabachanlage 6, W-8520 Erlangen, Germany. Tel: 09131-854444; Fax: 09131-854436.

### **5th Postgraduate Course of Endocrinology and 2nd International Symposium on Hypertension**

The Servico de Endocrinologia will hold its 5th Postgraduate Course of Endocrinology and 2nd International Symposium on Hypertension in Granja, Portugal at the Hotel Solverde, 24–26 June 1993. The deadline for all lecture and communication submissions is 31 March 1993. For more information contact Dr. Ignacio Salcedo, Servico de Endocrinologia, Symposium 93, Hospital Geral de Santo Antonio, 4000 Porto, Portugal. Phone: 200 52 41/200 73 54, ext. 309-1-2-3. Fax: 02-32-03-18.

Center, Kobe, Japan. The congress will focus on prevention of diabetes and clarification of goals to reach by the year 2000. For more information contact S. Ohsata, Kobe Convention Center, 6-9-1, Manatojima-nakamachi, Chuo-Ku, Kobe 650, Japan. Tel: 078-303-0055; Fax: 078-302-7303.

### **International Genetic Collaborative Study**

The Institut de Morphologie Pathologique Loveral, Center for Human Genetics, is starting an international collaborative study. Clinicians with patients who have total lipodystrophy (lipotrophic diabetes, Berardinelli-Seip syndrome) can enter an international genetic collaborative study aimed at localizing the gene responsible for the disease. Participation consists of providing a single blood sampling of affected patients, unaffected siblings, and their parents. For more information contact Dr. Lionel Van Maldergem, Center for Human Genetics, IMPL, Allee des Templiers 41, 6280 Loveral, Belgium. Tel: 0032-71-471520; Fax: 0032-71-471520.

## *ADA Research Awards*

### **ADA Career Development Awards**

ADA Career Development Awards will provide up to \$75,000/yr for 3 yr to support new researchers with 2–5 yr of postdoctoral/postfellowship research experience. Funds are to be divided between salary and other grant support. Applicants must be U.S. citizens or have permanent resident status and hold full-time positions at U.S. university-affiliated

institutes. The deadline for 1 July 1993 funding is 1 February 1993.

### **ADA Research Awards**

ADA Research Awards will provide between \$20,000 and \$40,000/yr for 2 yr to assist researchers, new or established, who have a novel, exciting idea for which they need support. Applicants must be U.S. citizens or have permanent resident status and hold full-time faculty positions at U.S. university-affiliated institutions. The deadline for 1 July 1993 funding is 1 February 1993.

### **Clinical Research Grant Program**

The Clinical Research Grant Program provides up to \$70,000/yr for 3 yr for studies that involve humans. Studies must focus on intact human subjects in which the effect of a change in the individual's external or internal environment is evaluated. In vitro research on human blood or tissue samples does not qualify unless there has been a major in vivo intervention, and the protocol is designed specifically to quantitate the effect of the manipulation. Applicants must be U.S. citizens or have permanent resident status and hold full-time faculty positions at U.S. university-affiliated institutions. The deadline for 1 July 1993 funding is 1 February 1993.

## *Research Awards*

### **Mentor-Based Postdoctoral Fellowship Program**

Mentor-based Postdoctoral Fellowship Program Awards, in the amount of \$30,000/yr for 3 yr, are given to support

a postdoctoral fellow working with an established diabetes investigator. The investigator must be a U.S. citizen or have permanent residence status and hold an appointment at a U.S. research institution. The fellow must have an MD or PhD and no more than 3 yr of postdoctoral research experience. The application deadline is 9 October 1992 for 1 July 1993 funding. For more information and applications contact the American Diabetes Association, 1660 Duke Street, Alexandria, VA 22314. Tel: 703-549-1500, ext. 362.

### **Lions SightFirst Diabetic Retinopathy Research Program**

The Lions SightFirst Diabetic Retinopathy Research Program supports clinical or applied research in diabetic retinopathy in the U.S. and abroad. Up to \$40,000/yr for 2 yr will be given to support new treatment regimens, epidemiology, and translation research. The deadline for 1 July 1993 funding is 1 February 1993.

### **Medical Student Diabetes Research Fellowship Program**

The Medical Student Diabetes Research Fellowship Program will award up to \$4000 for a 3- to 6-mo period to promote medical student interest in careers of diabetes-related clinical or basic research. Applicants must have a qualified sponsor and must have completed at least 1 yr of medical school. The award stipend will be \$3000 to cover the 3- to 6-mo period of research experience, and \$1000 will be made available to the sponsor to defray costs. The deadline for 1 July 1993 funding is 1 March 1993.
